# Supplementary material
Source: Springer Nature journal article supplement (https://www.springermedizin.de/resource/supplementary/12905_2013_375_MOESM1_ESM.pdf/9518586)
Supplement: MOESM1 [file 9518586]

## Additional files

### Additional file 1 – Participants' characteristics and factor loading on the four factors

| Participant No.                 | Education level* | FGC status | Factor loading           |                          |                          |                          |
|---------------------------------|------------------|------------|--------------------------|--------------------------|--------------------------|--------------------------|
|                                 |                  |            | 1                        | 2                        | 3                        | 4                        |
| 1                               | Primary          | Yes        | 0.141                    | 0.294                    | <b>0.822<sup>X</sup></b> | 0.234                    |
| 2                               | Institute        | No         | 0.085                    | <b>0.874<sup>X</sup></b> | 0.208                    | 0.319                    |
| 3                               | Institute        | Yes        | 0.001                    | <b>0.860<sup>X</sup></b> | 0.327                    | 0.233                    |
| 4                               | Illiterate       | No         | 0.024                    | <b>0.923<sup>X</sup></b> | 0.239                    | 0.126                    |
| 5                               | College          | Yes        | 0.147                    | <b>0.864<sup>X</sup></b> | 0.287                    | 0.254                    |
| 6                               | Secondary        | No         | 0.066                    | <b>0.811<sup>X</sup></b> | 0.363                    | 0.169                    |
| 7                               | Institute        | No         | 0.104                    | <b>0.867<sup>X</sup></b> | 0.317                    | 0.215                    |
| 8                               | Primary          | Yes        | -0.050                   | <b>0.791<sup>X</sup></b> | 0.286                    | 0.253                    |
| 9                               | Illiterate       | Yes        | <b>0.522<sup>X</sup></b> | -0.104                   | -0.003                   | -0.088                   |
| 10                              | Institute        | No         | 0.388                    | 0.328                    | <b>0.430<sup>X</sup></b> | 0.321                    |
| 11                              | Primary          | Don't know | 0.280                    | -0.036                   | 0.108                    | 0.080                    |
| 12                              | Illiterate       | Yes        | 0.343                    | 0.340                    | 0.155                    | 0.154                    |
| 13                              | Secondary        | Yes        | 0.252                    | 0.312                    | <b>0.451</b>             | <b>0.458</b>             |
| 14                              | College          | No         | 0.151                    | <b>0.469</b>             | 0.334                    | <b>0.490</b>             |
| 15                              | Institute        | Yes        | 0.393                    | <b>0.487</b>             | <b>0.461</b>             | 0.259                    |
| 16                              | College          | No         | 0.378                    | <b>0.614<sup>X</sup></b> | 0.407                    | 0.312                    |
| 17                              | Primary          | Yes        | 0.107                    | <b>0.483</b>             | 0.338                    | <b>0.513</b>             |
| 18                              | College          | Yes        | 0.108                    | <b>0.879<sup>X</sup></b> | 0.150                    | 0.264                    |
| 19                              | Institute        | Yes        | 0.146                    | 0.233                    | 0.194                    | <b>0.753<sup>X</sup></b> |
| 20                              | College          | No         | 0.297                    | 0.353                    | 0.392                    | <b>0.661<sup>X</sup></b> |
| 21                              | Secondary        | Yes        | <b>0.502<sup>X</sup></b> | 0.358                    | 0.140                    | 0.366                    |
| 22                              | Institute        | No         | <b>0.423</b>             | <b>0.493</b>             | 0.290                    | 0.352                    |
| 23                              | Primary          | Yes        | <b>0.694<sup>X</sup></b> | 0.111                    | 0.162                    | 0.143                    |
| 24                              | Primary          | Yes        | 0.184                    | <b>-0.468</b>            | <b>-0.426</b>            | <b>-0.518</b>            |
| 25                              | Institute        | No         | 0.196                    | 0.288                    | <b>0.852<sup>X</sup></b> | 0.188                    |
| 26                              | Institute        | No         | 0.176                    | 0.266                    | <b>0.848<sup>X</sup></b> | 0.216                    |
| 27                              | Secondary        | No         | 0.245                    | 0.371                    | <b>0.812<sup>X</sup></b> | 0.220                    |
| 28                              | Secondary        | No         | 0.237                    | 0.358                    | <b>0.838<sup>X</sup></b> | 0.219                    |
| 29                              | Secondary        | Yes        | <b>0.520</b>             | <b>0.567</b>             | 0.275                    | 0.034                    |
| Eigenvalues                     |                  |            | 1.77                     | 15.77                    | 1.80                     | 1.14                     |
| Defining sorts                  |                  |            | 3                        | 9                        | 6                        | 2                        |
| Explained variance %            |                  |            | 9                        | 31                       | 20                       | 11                       |
| Explained variance cumulative % |                  |            | 9                        | 40                       | 60                       | 71                       |

FGC: Female genital cutting

\* Institute; 2 years study after secondary school, College; 4 years study after secondary school.

Bold type indicates significant loadings. Significance at the 1% level is taken as a factor loading greater than  $(2.58 \times 1/\sqrt{n})$ , where  $n$  = the number of statements - so in this case significant loadings are those higher than 0.413.

<sup>X</sup> indicates defining sorts.
